# Supplementary material for: Li4B10H10B12H12 as solid electrolyte for solid-state lithium batteries
Source: Royal Society of Chemistry journal article supplement (doi:10.1039/d3ta03914e), 2023-01-01
Supplement: d3ta03914e1.pdf [file d3ta03914e1.pdf]

## Supplementary information:

# Li<sub>4</sub>B<sub>10</sub>H<sub>10</sub>B<sub>12</sub>H<sub>12</sub> as solid electrolyte for solid-state lithium batteries

Andrea Garcia<sup>1</sup>, Gian Müller<sup>1</sup>, Radovan Černý<sup>2</sup>, Daniel Rentsch<sup>1</sup>, Ryo Asakura<sup>1</sup>, Corsin Battaglia<sup>1</sup>, and Arndt Remhof<sup>1\*</sup>

<sup>1</sup> *Empa, Swiss Federal Laboratories of Materials Science and Technology, Dübendorf, Switzerland*

<sup>2</sup> *Laboratory of crystallography DQMP, University of Geneva, Quai Ernest-Ansermet 24, 1211 Geneva, Switzerland*

\*arndt.remhof@empa.ch

|                                                                                                                                                                                     |   |
|-------------------------------------------------------------------------------------------------------------------------------------------------------------------------------------|---|
| Figure S1. DSC and TG signals of the as-received precursors .....                                                                                                                   | 2 |
| Figure S2. XRD pattern of the as-received precursors.....                                                                                                                           | 2 |
| Figure S3. <sup>23</sup> Na NMR confirming the ion exchange.....                                                                                                                    | 2 |
| Figure S4. Voltammograms of Li <sub>2</sub> B <sub>10</sub> H <sub>10</sub> and Li <sub>2</sub> B <sub>12</sub> H <sub>12</sub> .....                                               | 2 |
| Figure S5. Ionic conductivity of the ion-exchanged the Li <sub>2</sub> B <sub>10</sub> H <sub>10</sub> and Li <sub>2</sub> B <sub>12</sub> H <sub>12</sub> mixtures.....            | 3 |
| Figure S6. XRD of the Li <sub>2</sub> B <sub>10</sub> H <sub>10</sub> and Li <sub>2</sub> B <sub>12</sub> H <sub>12</sub> mixtures recovered from solutions with different solvents | 4 |
| Figure S7. Charge-discharge voltage profiles .....                                                                                                                                  | 4 |

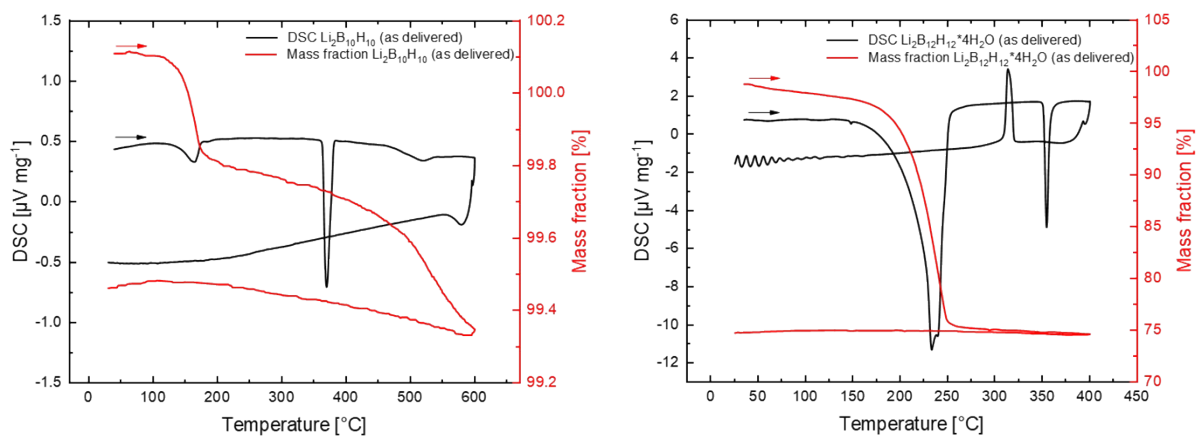

**Figure S1.** DSC (black) and TG (red) signals of the as-received precursors  $\text{Li}_2\text{B}_{10}\text{H}_{10}$  and  $\text{Li}_2\text{B}_{12}\text{H}_{12}\cdot 4\text{H}_2\text{O}$ .

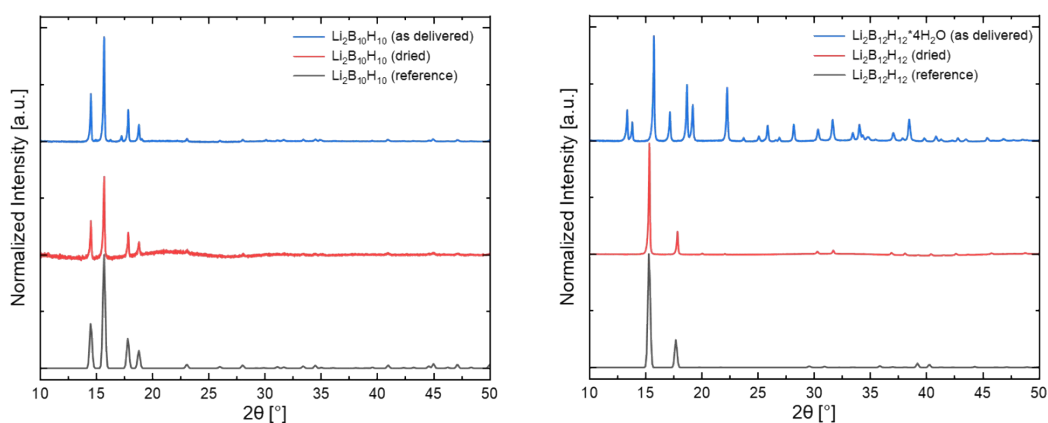

**Figure S2.** XRD pattern of the as-received precursors ( $\text{Li}_2\text{B}_{10}\text{H}_{10}$  and  $\text{Li}_2\text{B}_{12}\text{H}_{12}\cdot 4\text{H}_2\text{O}$ ) (blue), the dried precursors (red), and the references (black)<sup>1</sup>.

<sup>1</sup> Reference pattern taken from the ICSD Database. The database refers to Wu et al., *J. Phys. Chem. C* 2015, 119, 6481 (for  $\text{Li}_2\text{B}_{10}\text{H}_{10}$ ) [9] and Her et al., *Inorg. Chem.* 2008, 47 9757 (for  $\text{Li}_2\text{B}_{12}\text{H}_{12}$ ) [27].

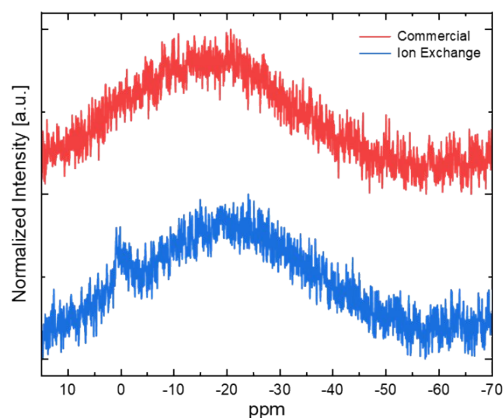

**Figure S3.**  $^{23}\text{Na}$  NMR spectra of a stoichiometric mixture of  $\text{Li}_2\text{B}_{10}\text{H}_{10}$  and  $\text{Li}_2\text{B}_{12}\text{H}_{12}$  prepared from the commercial precursors (red) and ion-exchanged  $\text{Na}_2\text{B}_{10}\text{H}_{10}$  and  $\text{Na}_2\text{B}_{12}\text{H}_{12}$  (blue).

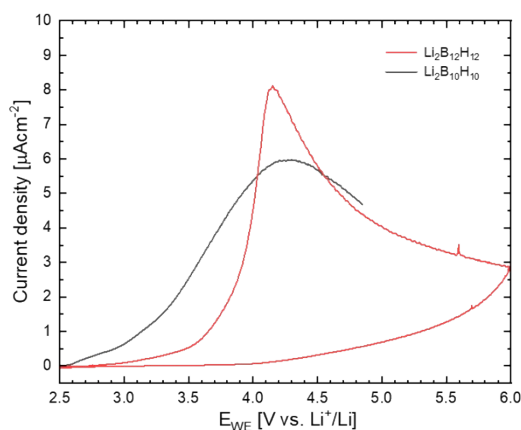

**Figure S4.** Voltammograms of the  $\text{Li}/\text{SE}/\text{SE-C}/\text{Pt}$  cells at a scan rate of  $10 \mu\text{V s}^{-1}$  between 2.5 V and 6.0 V vs  $\text{Li}^+/\text{Li}$  at  $120^\circ\text{C}$ , using  $\text{Li}_2\text{B}_{10}\text{H}_{10}$  and  $\text{Li}_2\text{B}_{12}\text{H}_{12}$  as a solid electrolyte.

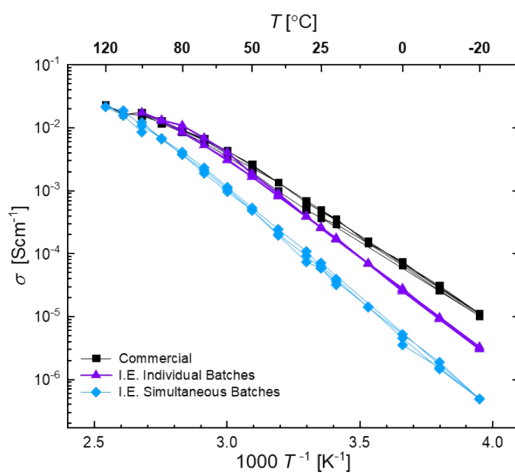

**Figure S5.** Temperature-dependent lithium-ion conductivity of the dried and ball-milled 1:1 stoichiometric mixture of (i) the dried commercial precursors  $\text{Li}_2\text{B}_{10}\text{H}_{10}$  and  $\text{Li}_2\text{B}_{12}\text{H}_{12}$ , (ii)  $\text{Li}_2\text{B}_{10}\text{H}_{10}$  and  $\text{Li}_2\text{B}_{12}\text{H}_{12}$  obtained

by ion exchange of  $\text{Na}_2\text{B}_{10}\text{H}_{10}$  and  $\text{Na}_2\text{B}_{12}\text{H}_{12}$  from individual batches and (iii)  $\text{Li}_2\text{B}_{10}\text{H}_{10}$  and  $\text{Li}_2\text{B}_{12}\text{H}_{12}$  obtained from the simultaneous ion exchange of  $\text{Na}_2\text{B}_{10}\text{H}_{10}$  and  $\text{Na}_2\text{B}_{12}\text{H}_{12}$ .

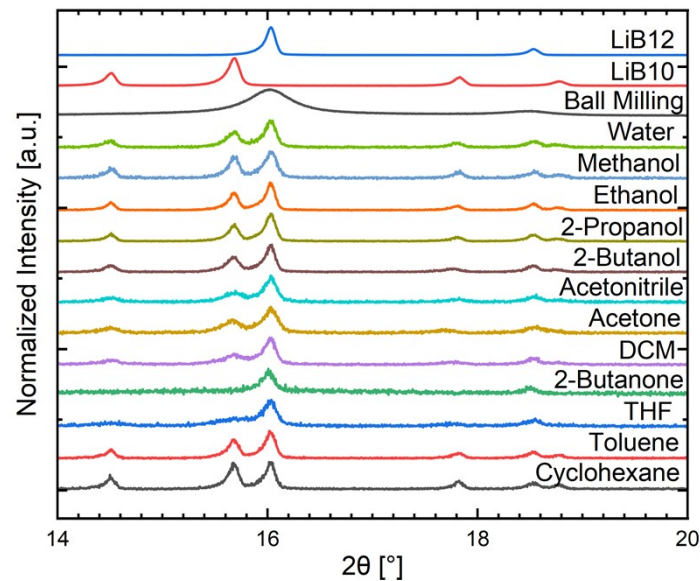

**Figure S6.** XRD pattern of the  $\text{Li}_2\text{B}_{10}\text{H}_{10}$  and  $\text{Li}_2\text{B}_{12}\text{H}_{12}$  mixtures recovered from solutions with different solvents. Except for 2-butanone, they all show the coexistence of the initial phases.

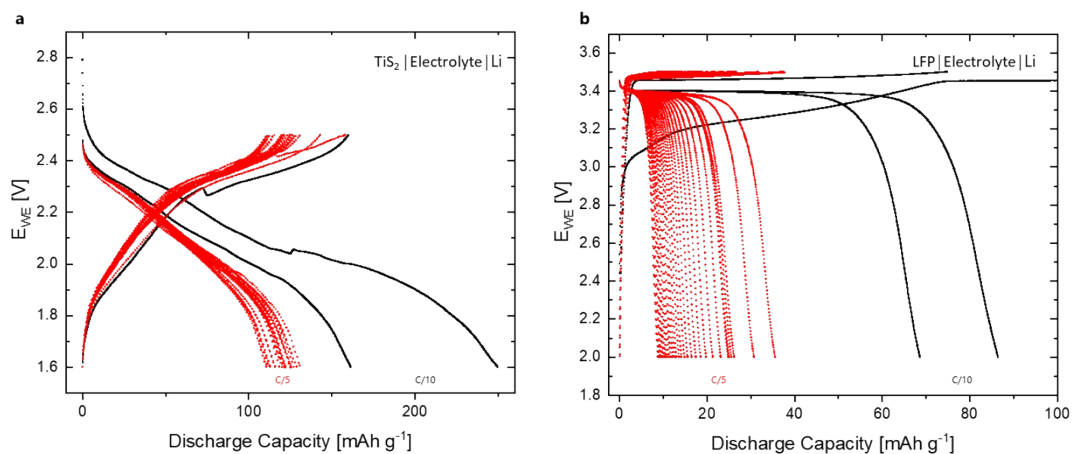

**Figure S7.** a) Charge-discharge voltage profiles for 39 cycles at a C-rate of C/5 after two initial cycles at C/10, using a  $\text{TiS}_2|\text{SE}|\text{Li}$  cell under 1.71 MPa at 60 °C. The cathode composite contained 40 wt%  $\text{TiS}_2$ , 50 wt% solid electrolyte and 10 wt% carbon. The cell failed in the 39<sup>th</sup> cycle. b) Charge-discharge voltage profiles for the first 32 cycles at a C-rate of C/5 after two initial cycles at C/10, using a  $\text{LiFePO}_4|\text{SE}|\text{Li}$  cell under 1.71 MPa at 60 °C. The cathode composite contained 30 wt%  $\text{LiFePO}_4$ , 50 wt% solid electrolyte, 15 wt% carbon, and 5 wt% PVDF.
